# Supplementary material for: Regulation of Aerobic Energy Metabolism in Podospora anserina by Two Paralogous Genes Encoding Structurally Different c-Subunits of ATP Synthase
Source: PLoS Genet. 2016 Jul 21;12(7):e1006161. doi: 10.1371/journal.pgen.1006161 (PMC4956034; doi:10.1371/journal.pgen.1006161)
Supplement: S5 Table — Gene nomenclature is according to the Podospora anserina Genome Project (http://podospora.igmors.u-psud.fr/). Fw and Rev correspond to the couples of primers used for qRT-PCR experiments. In each couple of primers one (*) overlaps an exon-exon junction to minimize non specific amplification. (DOCX) [file pgen.1006161.s006.docx]

| | Gene name |  | Primers sequence | |  | | --- | --- | --- | --- | --- | | Pa_5_9140 | 1 | GCATCACCTCTGCATACCCC | | | | *Atp9-5* | 2 | gtggtacCCATTGTGTCTGATGAGAAGG | |  | |  | 3 | ctgccccTAAGTGTTTTGCTTCGGAGGTC | |  | |  | 4 | ccccgtcgACCTCGAGTGAGGGCTGG | |  | |  | 20 | GGTTCGAACAAAACCAAGCTT | |  | |  | 21 | gggcggccGCATCAGGGTACCGGGAC | |  | |  | Fw* | TCATGGCCAAGTTCACCTAAGC | |  | |  | Rev | CGATCGCTCCCAGTGAGG | |  | | Pa_7_10 | 5 | ggggaagcTTGTTAGGAGAGGAGTGTACC | | | | *Atp9-7* | 6 | gtggtaccCATTTTGACGAGACGGAGAAAT | | | |  | 7 | tgcccctaaACATGTCGTCTGGGGCGCT | |  | |  | 8 | gggggtcGACCGCATCGATTGCGTGAC | |  | |  | Fw* | CGGCTCTCAGGTCCCAGC | |  | |  | Rev | AGTTTTGGACACTCAGAAATAC | |  | | *nat1* | 15 | cagacacaATGGGTACCACTCTTGACGAC | |  | |  | 16 | agcaaaacacTTAGGGGCAGGGCATGCTC | |  | |  | 17 | ctcgtcaaaATGGGTACCACTCTTGACGAC | |  | |  | 18 | agacgacatgtTTAGGGGCAGGGCATGCTC | |  | | Pa_3_1710 | Fw* | GATGTCTGTTCCCCATCGAC | |  | | *Aox* | Rev | GAGGAAATGTTGGCAGTGGTG | |  | | Pa_3_5410 | Fw* | AGTACGCTGAGTACATGCTC | |  | | *Gpd* | Rev | GGTGAAGACACCGGTGGAC | |  | | Pa_7_6690 | Fw | GGCTGGCTTGGCGATACC | |  | | *Pdf2* | Rev* | CTGGCCAAGGTCGAGATAG |  |  | |
| --- | --- | --- | --- | --- | --- | --- | --- | --- | --- | --- | --- | --- | --- | --- | --- | --- | --- | --- | --- | --- | --- | --- | --- | --- | --- | --- | --- | --- | --- | --- | --- | --- | --- | --- | --- | --- | --- | --- | --- | --- | --- | --- | --- | --- | --- | --- | --- | --- | --- | --- | --- | --- | --- | --- | --- | --- | --- | --- | --- | --- | --- | --- | --- | --- | --- | --- | --- | --- | --- | --- | --- | --- | --- | --- | --- | --- | --- | --- | --- | --- | --- | --- | --- | --- | --- | --- | --- | --- | --- | --- | --- | --- | --- | --- | --- | --- | --- | --- | --- | --- | --- | --- | --- | --- | --- | --- | --- | --- | --- | --- | --- | --- | --- | --- | --- | --- | --- | --- | --- | --- | --- | --- | --- | --- | --- |

**S5 Table. List of primers.**
